# Supplementary material for: microRNA 31 functions as an endometrial cancer oncogene by suppressing Hippo tumor suppressor pathway
Source: PubMed Central journal article supplement (PMC4067122; doi:10.1186/1476-4598-13-97), 2014-04-29

# Supplementary Figure S4

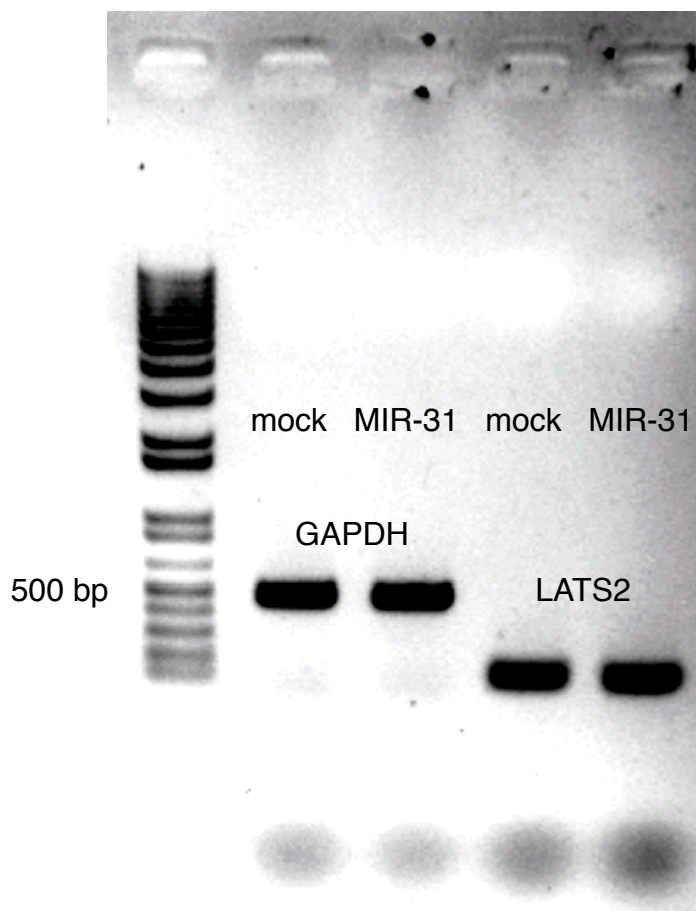

Supplement: 1476-4598-13-97-S4.pdf [file 1476-4598-13-97-S4.pdf]
