# Supplementary material for: microRNA 31 functions as an endometrial cancer oncogene by suppressing Hippo tumor suppressor pathway
Source: PubMed Central journal article supplement (PMC4067122; doi:10.1186/1476-4598-13-97), 2014-04-29
Supplement: 1476-4598-13-97-S10.pdf [file 1476-4598-13-97-S10.pdf]

Supplementary Table S1

|             | Low-risk | High-risk | Total |
|-------------|----------|-----------|-------|
| miR-31 low  | 1        | 3         | 4     |
| miR-31 high | 1        | 8         | 9     |
| Total       | 2        | 11        | 13    |
